# Supplementary material
Source: Springer Nature journal article supplement (https://www.springermedizin.de/resource/supplementary/12962_2006_43_MOESM2_ESM.pdf/9572014)

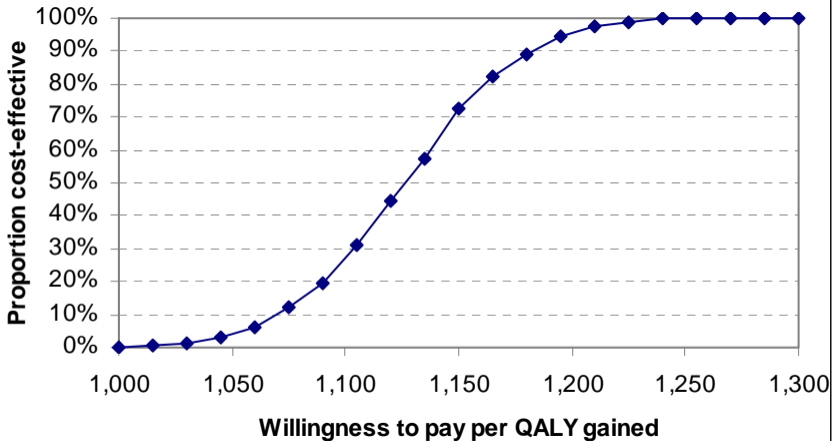

Supplement: MOESM2 [file 9572014]
